# Supplementary material for: Bulk monolithic electrodes enabled by surface mechanical attrition treatment-facilitated dealloying
Source: Royal Society of Chemistry journal article supplement (doi:10.1039/c6ta04037c), 2016-01-01
Supplement: c6ta04037c1.pdf [file c6ta04037c1.pdf]

## Supplementary Information for

### Bulk monolithic electrodes enabled by surface mechanical attrition treatment-facilitated dealloying

Jie Zhang,<sup>a,c</sup> Lap-Chung Chan,<sup>b</sup> Ting Gao,<sup>d</sup> Qing Wang,<sup>b</sup> Shanshan Zeng,<sup>a,c</sup> Haidong Bian,<sup>a,e</sup>

Chris Lee,<sup>a,c</sup> Zhengtao Xu,<sup>e</sup> Yang Yang Li,<sup>a,c,f,\*</sup> and Jian Lu<sup>b,g,\*</sup>

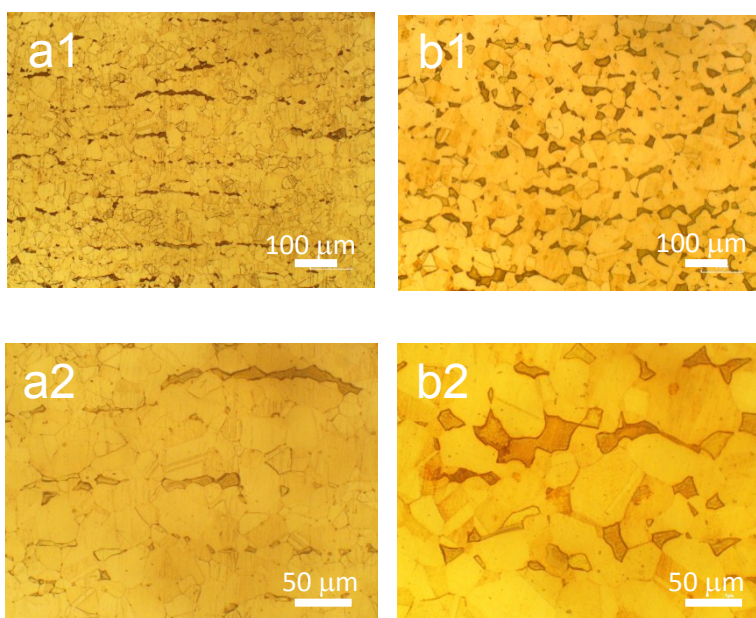

**Fig. S1.** Optical micrographs of the CuZn alloys as-received (a1, a2) and after annealed at 600 °C for 1 hr (b1, b2). It can be seen that the CuZn alloy is a 2-phase system. The two phases in the as-received sample displayed elongated and oriented grains, possibly resulted from the cold work treatment during manufacturing, whereas the thermal annealing restored homogeneous and uniform grain distribution for both phases.

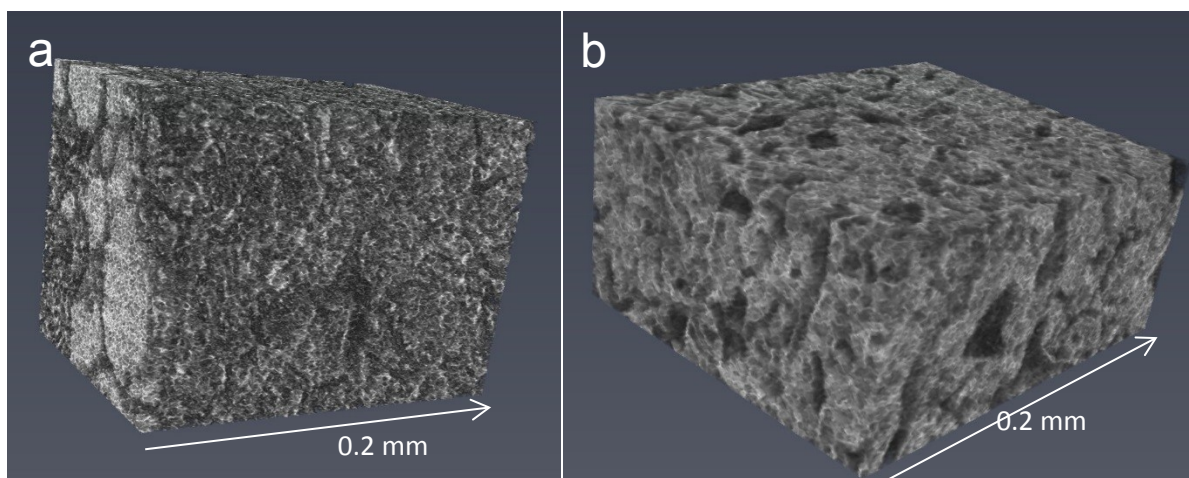

**Fig. S2.** X-ray synchrotron tomography images of bulk porous Cu structures that was SMATed for 0 (a) and 12 (b) min and dealloyed for 7 hr. Note that the darker regions in b is the dealloyed  $\beta$  phase.

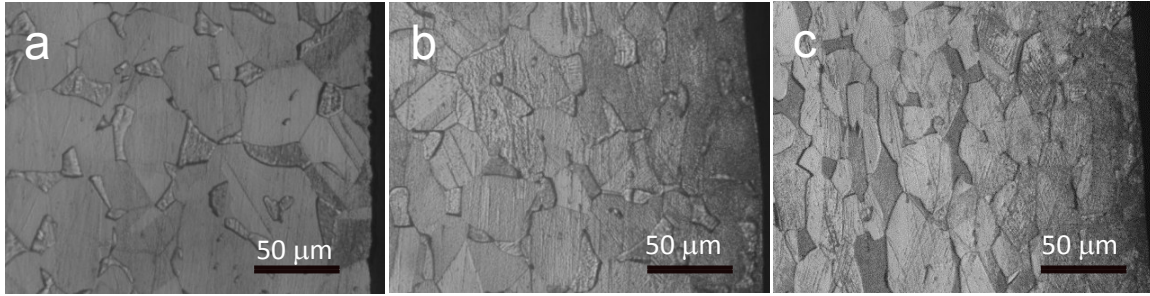

**Fig. S3.** Cross-sectional optical metallographic images of the as-annealed CuZn alloy after subjection to SMAT for 0 (a), 1 (b), and 12 (c) min. Reduced grain sizes, denser grain boundaries, and accumulated defects (e.g., slip or twinning boundaries) are clearly observed after the SMAT.

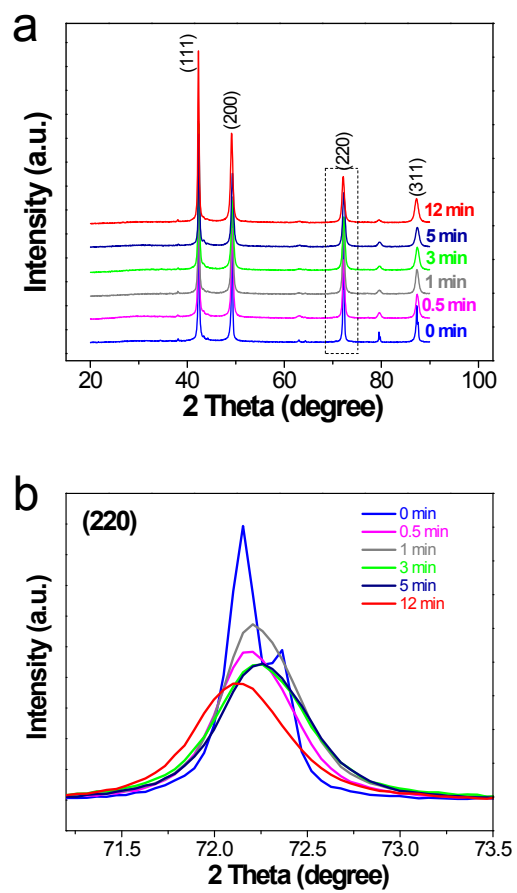

**Fig. S4.** XRD patterns collected on the CuZn samples that were SMATed for different time duration.

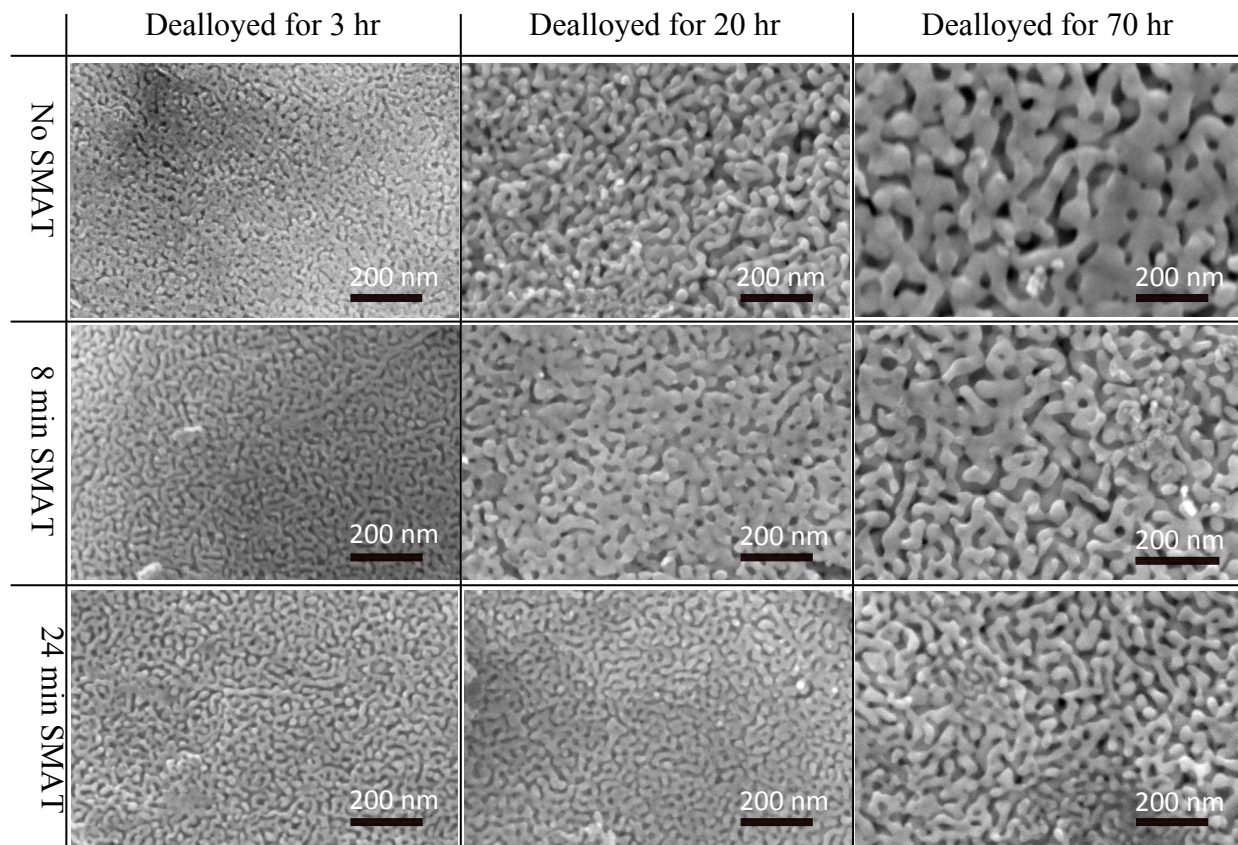

**Fig. S5.** SEM images of nanoporous gold fabricated from the commercial AuAg pellet (Kurt J. Lesker, Au<sub>44</sub>Ag<sub>56</sub> by weight, 99.99% pure, 10 mm diameter × 10 mm long). The AuAg pellet was wire cut into 0.5 mm thick disks, polished, SMATed, and dealloyed in 67% HNO<sub>3</sub> at room temperature. The SMAT effects observed on the AuAg alloy system is consistent with the CuZn alloy system, e.g., anti-coarsening enabled.



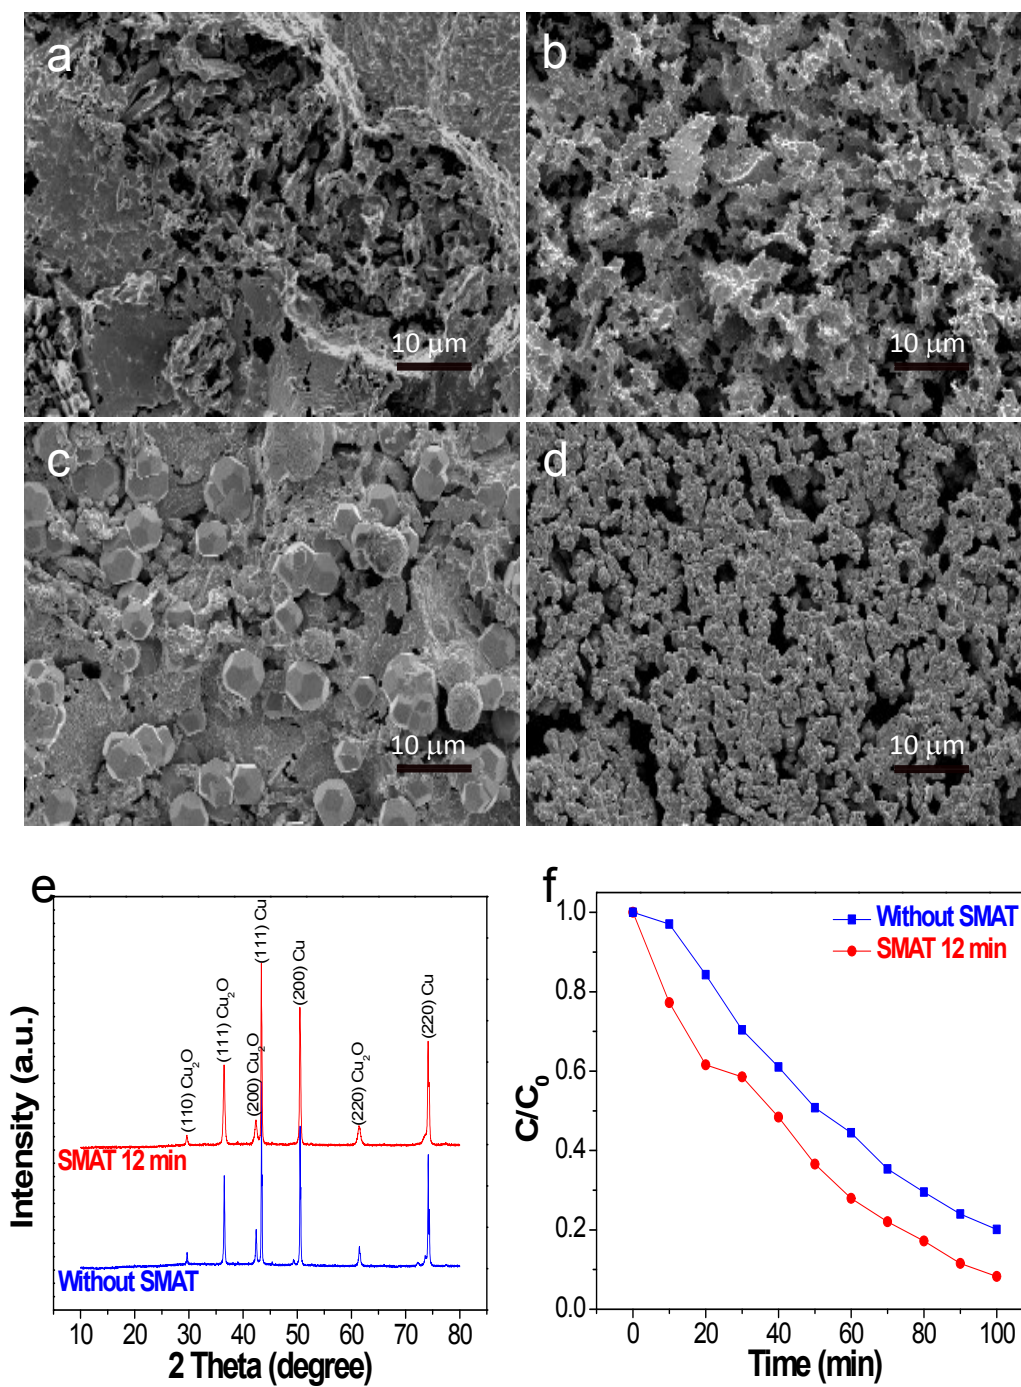

**Fig. S6.** a-d) SEM images of the porous Cu frameworks that was pre-SMATed for 0 (a,c) and 12 (b,d) min and dealloyed for 7 hours, before (a,b) and after (c,d) coated with Cu<sub>2</sub>O. e) XRD

patterns of the Cu<sub>2</sub>O-coated Cu frameworks whose SEM images were shown in c, d. f) Ratio of the actual and initial concentrations ( $c/c_0$ ) of methyl blue as a function of the UV illumination time measured on the sample whose SEM images were shown in c, d. The Cu<sub>2</sub>O coating was fabricated by soaking the dealloyed porous Cu frameworks (dealloyed for 7 hr) in an aqueous solution of copper (II) sulfate (Aldrich, 2.5 mM), ammonium nitrite (Aldrich, 1.25 mM), and ammonium hydroxide (Riedal–Dehaën, 2.7%) at 90 °C for 20 min.

**Table S1. Performance comparison with some recent bulk framework-based supercapacitor electrodes**

| Material system                                                                                                                                              | Area-specific capacitance ( $\text{F cm}^{-2}$ )                                                                                                                | Volume-specific capacitance ( $\text{F cm}^{-3}$ )                                                | Reference                             |
|--------------------------------------------------------------------------------------------------------------------------------------------------------------|-----------------------------------------------------------------------------------------------------------------------------------------------------------------|---------------------------------------------------------------------------------------------------|---------------------------------------|
| NiOOH@Cu film (250 $\mu\text{m}$ thick)                                                                                                                      | 11.2 @ 6 mA $\text{cm}^{-2}$<br>10.5 @ 12 mA $\text{cm}^{-2}$<br>9.63 @ 20 mA $\text{cm}^{-2}$                                                                  | 448.8 @ 6 mA $\text{cm}^{-2}$<br>420.1 @ 12 mA $\text{cm}^{-2}$<br>385.2 @ 20 mA $\text{cm}^{-2}$ | This study                            |
| CNT by CVD/MnO <sub>2</sub> by hydrothermal @ graphene foam by templating Ni foam (1 mm thick)                                                               | 0.75 @ 5 mV $\text{s}^{-1}$                                                                                                                                     |                                                                                                   | Energy Environ. Sci., 7, 3709 (2014)  |
| NiCo <sub>2</sub> O <sub>4</sub> nanoneedles @ Ni foam                                                                                                       | 3.12 @ 1.11 mA $\text{cm}^{-2}$<br>0.79 @ 11.12 mA $\text{cm}^{-2}$                                                                                             |                                                                                                   | Energy Environ. Sci. 5, 9453 (2012)   |
| NiCuMnOOH oxyhydroxide by dealloying Ni <sub>15</sub> Cu <sub>15</sub> Mn <sub>70</sub> (at.%) alloy ribbons (20 $\mu\text{m}$ thick)                        | 1.2054 @ 0.5 mA $\text{cm}^{-2}$                                                                                                                                | 627 @ 0.5 mA $\text{cm}^{-2}$                                                                     | Angew. Chem. Int. Ed. 54, 8100 (2015) |
| Reduced graphene oxide-based hydrogel film (~ 350 $\mu\text{m}$ thick)                                                                                       | 0.071 @ 1 mA $\text{cm}^{-2}$<br>0.063 @ 10 mA $\text{cm}^{-2}$<br>0.0547 @ 100 mA $\text{cm}^{-2}$                                                             |                                                                                                   | Adv. Mater. 27, 4469 (2015)           |
| Ni(OH) <sub>2</sub> by electrodeposition/CoO nanowalls by hydrothermal @ Ni foam (~ 0.1 mm thick)                                                            | 11.5 @ 5 mA $\text{cm}^{-2}$<br>6.49 @ 40 mA $\text{cm}^{-2}$                                                                                                   |                                                                                                   | Adv. Mater. 24, 4186 (2012)           |
| Ni(OH) <sub>2</sub> by chemical bath deposition/CNT by CVD @ Ni foam                                                                                         | 16 @ 2.5 mA $\text{cm}^{-2}$                                                                                                                                    |                                                                                                   | Adv. Funct. Mater. 22, 1272 (2012)    |
| Porous Ni film (50 $\mu\text{m}$ ) by dealloying NiMn film                                                                                                   | 1.40 @ 1 mA $\text{cm}^{-2}$                                                                                                                                    | 334 @ 1 mA $\text{cm}^{-2}$                                                                       | J. Power Sources 247, 896 (2014)      |
| <b>Cobalt oxide nanobrush-graphene @ Ni<sub>x</sub>Co<sub>2x</sub>(OH)<sub>6x</sub> by hydrothermal, two-step calcination and two-step electrodeposition</b> | 5.1 @ 1 A $\text{g}^{-1}$<br>4.96 @ 2 A $\text{g}^{-1}$<br>4.7 @ 5 A $\text{g}^{-1}$<br>4.66 @ 10 A $\text{g}^{-1}$<br>4.23 @ 20 A $\text{g}^{-1}$              |                                                                                                   | Nano Lett. 15, 2037 (2015)            |
| CoO/Ppy nanowire array @ Ni foam (~1.1 mm thick)                                                                                                             | 4.43 @ 1 mA $\text{cm}^{-2}$<br>2.51 @ 5 mA $\text{cm}^{-2}$<br>2.13 @ 10 mA $\text{cm}^{-2}$<br>1.79 @ 20 mA $\text{cm}^{-2}$<br>1.28 @ 50 mA $\text{cm}^{-2}$ |                                                                                                   | Nano Lett. 13, 2078 (2013)            |
| MnO <sub>2</sub> /CNT ink @ sponge (~ 1 mm thick) by dip coating and electrodeposition                                                                       | 0.0009 @ 1 mV $\text{s}^{-1}$                                                                                                                                   |                                                                                                   | Nano Lett. 11, 5165 (2011)            |
| RuO <sub>2</sub> nanoparticles @ graphene-CNT hybrid foam (0.5 mm thick) by CVD and sol-gel synthesis                                                        | 1.11 @ 1 mA $\text{cm}^{-2}$                                                                                                                                    |                                                                                                   | Sci. Rep. 4, 4452 (2014)              |
